# Supplementary material for: Repression of ferritin light chain translation by human eIF3
Source: eLife journal article supplement (doi:10.7554/elife.48193), 2019-08-15
Supplement: supp [file elife-48193-supp-v1.zip]

Archive with 23 entries (23 files):
- elife_poa_e48193_Figure_1_source_data_1.xlsx
- elife_poa_e48193_Figure_3_figure_supplement_3.pdf
- elife_poa_e48193_Figure_1_figure_supplement_1.pdf
- elife_poa_e48193_Figure_2_figure_supplement_3.pdf
- elife_poa_e48193_Figure_3_figure_supplement_2_source_data_1.xlsx
- elife_poa_e48193_Figure_3_figure_supplement_5.pdf
- elife_poa_e48193_Transparent_Reporting_File.docx
- elife_poa_e48193_Figure_3_figure_supplement_5_source_data_1.xlsx
- elife_poa_e48193_Figure_1_figure_supplement_1_source_data_1.xlsx
- elife_poa_e48193_Figure_2_figure_supplement_1.pdf
- elife_poa_e48193_Figure_2_source_data_1.xlsx
- elife_poa_e48193_Figure_3_figure_supplement_1.pdf
- elife_poa_e48193_Figure_4_source_data_1.xlsx
- elife_poa_e48193_Figure_4_figure_supplement_1.pdf
- elife_poa_e48193_Figure_3_figure_supplement_6.pdf
- elife_poa_e48193_Figure_2_figure_supplement_2.pdf
- elife_poa_e48193_Figure_4_figure_supplement_2_source_data_1.xlsx
- elife_poa_e48193_Figure_4_figure_supplement_2.pdf
- elife_poa_e48193_Figure_3_figure_supplement_4.pdf
- elife_poa_e48193_Figure_3_source_data_1.xlsx
- elife_poa_e48193_Figure_3_figure_supplement_2.pdf
- elife_poa_e48193_Figure_3_figure_supplement_4_source_data_1.xlsx
- elife_poa_e48193_Figure_2_figure_supplement_2_source_data_1.xlsx
