# Supplementary material for: Repression of ferritin light chain translation by human eIF3
Source: eLife journal article supplement (doi:10.7554/elife.48193), 2019-08-15
Supplement: supp [file elife-48193-supp-v1.zip › elife_poa_e48193_Figure_1_figure_supplement_1_source_data_1.xlsx]

## Sheet: Figure 1-figure supplement 1D
Figure 1 Figure Supplement 1D: Luciferase values
	Raw Counts			Fold difference
FTL	6351	7673	6387	0.93	1.13	0.94
∆PAR	638247	886551	822477	93.8	130.3	120.9
∆3RE	638247	886551	822477	25.6	23	18.6
