# Supplementary material for: Repression of ferritin light chain translation by human eIF3
Source: eLife journal article supplement (doi:10.7554/elife.48193), 2019-08-15
Supplement: supp [file elife-48193-supp-v1.zip › elife_poa_e48193_Figure_1_source_data_1.xlsx]

## Sheet: Sheet1
Figure 1E
	Raw Counts			Fold difference
FTL	826	378	630	1.35	0.62	1.03
∆PAR	24147	21021	23838	39.5	34.39	38.99
∆3RE	4390	2956	4811	7.18	4.84	7.87
