# Supplementary material for: Repression of ferritin light chain translation by human eIF3
Source: eLife journal article supplement (doi:10.7554/elife.48193), 2019-08-15
Supplement: supp [file elife-48193-supp-v1.zip › elife_poa_e48193_Figure_2_figure_supplement_2_source_data_1.xlsx]

## Sheet: Figure 2-figure supplement 2A
	FIG 2_2A Luciferase values				FIG 2_2A Luciferase values
	FTL	Δ3RE	Loop	Double	FTL	Δ3RE	G51C	G52C
	1	6.14	23.47	54.99	0.99	15.12	30.94
	0.76	2.49	29.81	46.32	1.45	8.64	7.98	6.06
	1.09	4.8	8.74	39.51	0.93	19.3	13.7	19.77
	1.15	4.85	8.47	138.62	1	8.06	21.66	5.94
	1.2	8.14	25.32	186.51	1.19	5.64	9.14	4.43
	0.99	13.84	41.36	161.09	1.04	8.37	17.73	19.16
	1.05	8.57	31.92	55.7	1.02	9.42	19.12	8.05
	0.79	5.43	7.98	57.83	0.36	2.74	7.8	8.3
	0.63	3.53	7.46	42.39	1.03	14.56	7.16	12.95
	0.88	4.26	13.04	36.29	0.99	15.12	30.94	6.29
				27.54
				30.72
				18.11
				12.5
				18.24

## Sheet: Figure 2-figure supplement 2B
	FIG 2_2b QPCR values
	FTL	Δ3RE	Loop	Double
	1.12055	0.786708	1.2193	0.67468
	0.914584	0.896656	1.20707	0.939505
	0.964863	1.03416	1.52593	0.864888
	0.879623	1.34894	1.19807	1.65224
	1.01567	1.21385	1.13142	1.06568
	1.10471	1.02754	1.01255	1.24977
	1.0348	1.49661	0.627708	1.90797
	0.975156	1.59264	0.657249	1.92836
	0.990046	1.60454	0.825301	2.15109
				0.791546
				0.754391
				0.687076
				0.941849
				0.816537
				0.771184
	FIG 2_2b QPCR values pt2
	FTL	Δ3RE	G51C	G52C
	0.995056	1.06447	1.13006	1.10516
	1.01177	1.12204	0.995039	1.24449
	0.993174	1.07909	1.07712	1.24679
	1.07873	0.931916	1.31299	1.56571
	1.02673	0.90351	1.33644	1.33721
	0.894547	1.05295	1.84397	1.96315
	1.17915	0.536367	0.410744	0.696552
	0.810717	0.721844	0.467087	0.939434
	1.01013	0.936553	0.425131	0.863161
