# Supplementary material for: Repression of ferritin light chain translation by human eIF3
Source: eLife journal article supplement (doi:10.7554/elife.48193), 2019-08-15
Supplement: supp [file elife-48193-supp-v1.zip › elife_poa_e48193_Figure_2_source_data_1.xlsx]

## Sheet: Figure 2 B
Figure 2B: Calculated RNA bound/ Total RNA
log[Agonist], M	FTL		Δ3RE
0.0001	0.775704	0.672239	0.768203	0.580644
3	0.782112	0.669427	0.791151	0.708513
3.3	0.691597	0.620821	0.810368	0.583078
3.6	0.33949	0.373431	0.678138	0.780158
3.9	0.215935	0.191637	0.553447	0.589309
4.08	0.182302	0.17106	0.462245	0.44834
4.2	0.157686	0.119567	0.384452	0.389461
4.3	0.105987	0.125572	0.312859	0.180567
4.7	0.0416325	0.05526	0.0772974	0.057987
4.88	0.0340146	0.040182	0.0813911	0.03303

## Sheet: Figure 2C
Figure 2C: IC50 (µM)
FTL	Δ3RE
1.359	6.213
1.524	10.98
2.018
3.022

## Sheet: Figure 2E
	Figure 2E: Raw counts							Figure 2E: fold luciferase differences
		FTL			Δ3RE				FTL	FTL	FTL	Δ3RE	Δ3RE	Δ3RE
	Native	826	378	630	9898	12122	8934	Native	1.35	0.62	1.03	7.18	4.84	7.87
	Extended	6597	9798	7097	4390	2956	4811	Extended	10.79	16.03	11.61	16.19	19.83	14.61

## Sheet: Figure 2F
Figure 2F: Luciferase values
Raw Counts				Fold Luciferase Difference
FTL	Δ3RE	Loop	Double	FTL	Δ3RE	Loop	Double
1084	7341	12188	78026	0.8	3.78	9.57	53.15
1468	5747	23412	46212	1.09	4.51	15.95	36.27
1274	6487	9746	52903	0.94	4.66	10.35	38.01
1940	4298	12122	86733	1.44	4.56	11.1827	44.7077
1392	7007	16235	34130	1.03	4.77	11.6631	36.2314
942	4565	31742	46104	0.7	4.21	16.3619	42.5314
