# Supplementary material for: Repression of ferritin light chain translation by human eIF3
Source: eLife journal article supplement (doi:10.7554/elife.48193), 2019-08-15
Supplement: supp [file elife-48193-supp-v1.zip › elife_poa_e48193_Figure_3_figure_supplement_2_source_data_1.xlsx]

## Sheet: Figure 3-figure supplement 2A
Figure 3 Fig Sup 2A
	HepG2		ED2
Native	0.778173	1.00442	0.762023	0.676218
FAC	1.18064	0.989664	0.73125	0.92009
DFO	0.373157	0.357654	0.468303	0.389295

## Sheet: Figure 3-figure supplement 2B
Figure 3 Fig Sup 2B
	HepG2			ED2
Native	0.625675	0.697933	0.740006	0.74751	0.600142	0.670205
FAC	0.598546	0.683908	0.710903	0.725652	0.626338	0.604582
DFO	0.371307	0.261519	0.403001	0.67976	0.730328	0.64154
