# Supplementary material for: Repression of ferritin light chain translation by human eIF3
Source: eLife journal article supplement (doi:10.7554/elife.48193), 2019-08-15
Supplement: supp [file elife-48193-supp-v1.zip › elife_poa_e48193_Figure_3_figure_supplement_4_source_data_1.xlsx]

## Sheet: Figure 3-figure supplement 4A
	Fig 3_4A FTL levels quantified
	FTL	Δ3RE
	0.284	0.676
	0.542	3.04393
	1.358	4.045
	0.40058	1.46735
	0.325524	3.98001

## Sheet: Figure 3-figure supplement 4B
Fig 3_4B FTL Iron Treatment Levels
	H2O	DFO							FAC
WT	1	0.0334501	0.443	0.217	0.13	0.13	0.11	0.11	3.34501	3.34501	3.25153
Δ3RE	1	0.697	0.555	0.558	0.33	0.49	0.37	0.16	2.73056	3.34501	1.81512

## Sheet: Figure 3-figure supplement 4C
Fig 3_4C FTH levels quantified
WT	Δ3RE
1.69293	0.486615
1.51782	0.102114
1.0709	0.0279713

## Sheet: Figure 3-figure supplement 4D
Fig 3_4D FTH Iron Treatment Levels
	H2O	DFO		FAC
WT	1	0.10716	0.183876	1.69811	1.58096
Δ3RE	1	0.282421	0.348154	25.6176	2.71308	5.10677
