# Supplementary material for: Repression of ferritin light chain translation by human eIF3
Source: eLife journal article supplement (doi:10.7554/elife.48193), 2019-08-15
Supplement: supp [file elife-48193-supp-v1.zip › elife_poa_e48193_Figure_3_figure_supplement_5_source_data_1.xlsx]

## Sheet: Figure 3-figure supplement 5B
Fig 3_5B FTL Iron Treatment Levels
	H2O	DFO			FAC
WT	1	0.440255	0.0812849	0.269029	7.11536	17.1016	3.48904
Δ3RE	1	0.662207	0.887965	0.376392	1.84644	4.03676	1.54449
Fig 3_5B FTH Iron Treatment Levels
	H2O	DFO		FAC
WT	1	0.232286	0.430588	9.31401
Δ3RE	1	0.271022	0.53035	6.3655
