# Supplementary material for: Repression of ferritin light chain translation by human eIF3
Source: eLife journal article supplement (doi:10.7554/elife.48193), 2019-08-15
Supplement: supp [file elife-48193-supp-v1.zip › elife_poa_e48193_Figure_3_source_data_1.xlsx]

## Sheet: Figure 3E
	Figure 3E
	Hek239T	Δ3RE
	67.3339	1.65144
	84.0948	1.33326

## Sheet: Figure 3F
Figure 3F
HepG2	Δ3RE
16.1199	0.850147
24.4927	0.973061

## Sheet: Figure 3G
Figure 3G: % Input Recovered
	HEK - IRP		HEK + IRP			Δ3RE + IRP
FTL	0.267896	0.339197	3.77339	3.71035	2.54315	9.23187	2.834	6.52714
FTH	0.411883	0.285087	10.9219	8.67043	8.21635	15.6278	21.1203	15.8741
β ACTIN	0.471272	0.455779	0.059335	0.0523737	0.050392	0.254701	0.14205	0.165995
