# Supplementary material for: Repression of ferritin light chain translation by human eIF3
Source: eLife journal article supplement (doi:10.7554/elife.48193), 2019-08-15
Supplement: supp [file elife-48193-supp-v1.zip › elife_poa_e48193_Figure_4_figure_supplement_2_source_data_1.xlsx]

## Sheet: Figure 4-figure supplement 2C
Fig4_2C: fold luciferase differences
	H2O
G51C_RLUC	1.15773	1.07914	1.19288	1.17272	0.672372	0.725161	0.995006	1.14076	0.81905	0.833295	0.962193	1.2497
G52C_RLUC	1.25962	0.89483	0.883901	1.10977	1.00953	0.842347	0.954116	1.10367	1.0459	0.962987	0.956173	0.977163
	DFO
G51C_RLUC	0.288901	0.286306	0.377067	0.160141	0.283151	0.392682	0.432842	0.39639	0.766207	0.50321	0.352681	0.467557
G52C_RLUC	0.229194	0.244236	0.243647	0.167282	0.196929	0.336404	0.454152	0.378878	0.603761	0.476602	0.473499	0.593273
	FAC
G51C_RLUC	1.20947	1.25726	1.34286	0.830084	1.11097	1.23992	1.19522	1.29725	2.16714	1.56007	1.38039	1.06479
G52C_RLUC	0.74855	1.50877	1.61615	1.06137	1.21668	2.20815	1.60386	1.44717	1.44462	1.22179	1.18155	1.38679

## Sheet: Figure 4-figure supplement 2D
	Fig4_2D: % input recovered
		HEK + IRP	HEK+ IRP	HEK+ IRP	G51C + IRP	G51C + IRP	G51C + IRP	G52C + IRP	G52C + IRP	G52C + IRP
	FTL	2.06	3.9	3.17	5.77	7.72	4.97	2.82	2.73	4.97
	RLUC	N/A	N/A	N/A	55.39	91.19	101.8	13.01	11.82	10.48
	ACTB	0.52	0.45	0.39	0.3	0.58	0.54	0.48	0.72	0.63
