# Supplementary material for: Repression of ferritin light chain translation by human eIF3
Source: eLife journal article supplement (doi:10.7554/elife.48193), 2019-08-15
Supplement: supp [file elife-48193-supp-v1.zip › elife_poa_e48193_Figure_4_source_data_1.xlsx]

## Sheet: Figure 4B
	Figure 4B: Luciferase values
	Raw Counts					Fold Luciferase Difference
	FTL	Δ3RE	Loop	G51C	G52C	FTL	Δ3RE	Loop	G51C	G52C
	2966	34977	686740	18371	238151	0.74	11.8	231.54	6.19	80.29
	4977	49251	743836	21664	284774	1.24	9.9	149.45	4.35	57.22
	4120	64764	945818	26786	272524	1.02	15.72	229.57	6.5	66.15

## Sheet: Figure 4C
Figure 4C: % input retrieved
FTL	Δ3RE	G51C	G52C
48.7512	9.29378	9.92402	6.97144
54.1882	9.3278	9.42615	6.78974

## Sheet: Figure 4D
Figure 4D: RNAbound/ total RNA
log[Agonist], µM	FTL		G51C			G52C			Loop		Δ3RE
-3	0.683817	0.787066	0.793944	0.661672	0.787089	0.800087	0.633853	0.794563	0.789372	0.745416	0.768203	0.580644
-0.522	0.674998	0.774409	0.808049	0.696657	0.783726	0.801257	0.7418	0.772497	0.78114	0.747593	0.791151	0.708513
-0.221	0.663841	0.764803	0.752986	0.680041	0.783653	0.781262	0.981955	0.765641	0.786448	0.733811	0.810368	0.583078
0.079	0.478696	0.747522		0.650647	0.791047	0.722993	0.644566	0.706022	0.784701	0.751737	0.678138	0.780158
0.38	0.194454	0.299508	0.583734	0.387685	0.59885	0.595841	0.52884	0.582828	0.780284	0.782996	0.553447	0.589309
0.56	0.150281	0.399254	0.41267	0.283759	0.428413	0.492327	0.437253	0.493777	0.809428	0.777179	0.462245	0.44834
0.68	0.126059	0.23143	0.38361	0.283342	0.507753	0.452503	0.419177	0.50414	0.79405	0.781575	0.384452	0.389461
0.78	0.185454	0.203574	0.29543	0.225018	0.371393	0.379156	0.48147	0.42403	0.805547	0.801822	0.312859	0.180567
1.17	0.0507891	0.0859061	0.185126	0.12203	0.203369	0.261898	0.276022	0.283823	0.8241	0.777571	0.0772974	0.057987
1.352		0.0463333			0.12661			0.20639		0.790674	0.0813911	0.03303
1.477		0.0341171			0.0891078			0.193879

## Sheet: Figure 4E
Figure 4E: IC50 (µM)
FTL	Δ3RE	G51C	G52C	Loop
1.359	6.213	4.65	5.361	0
1.524	10.98	4.014	4.574	0
2.018		6.898	5.842	0
3.022
