# Supplementary figures and images for: Repression of ferritin light chain translation by human eIF3
Source: eLife journal article supplement (doi:10.7554/elife.48193), 2019-08-15

## A FAC treatment

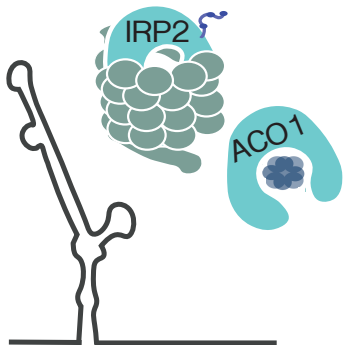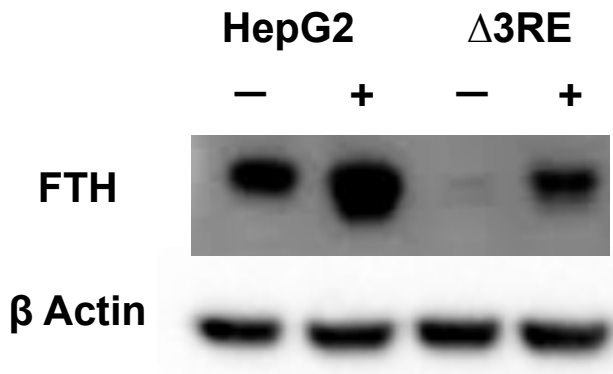

## B DFO treatment

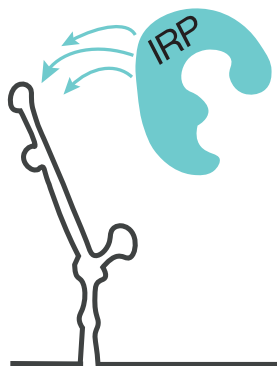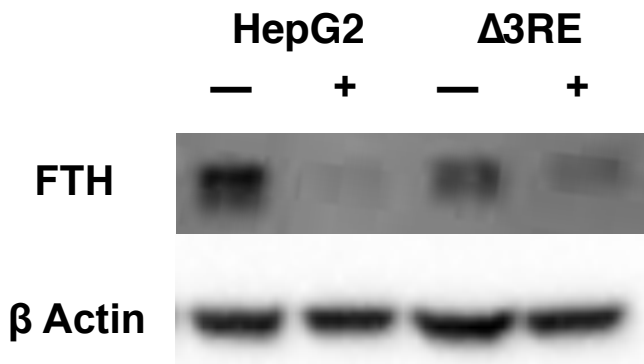

Supplement: supp [file elife-48193-supp-v1.zip › elife_poa_e48193_Figure_3_figure_supplement_3.pdf]

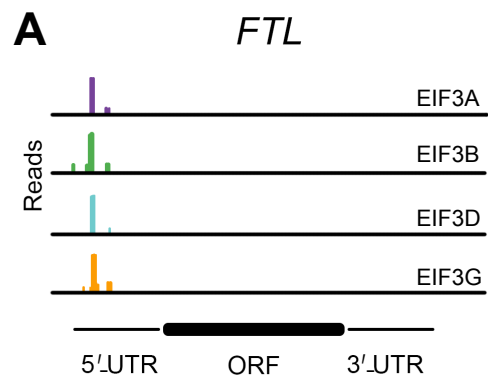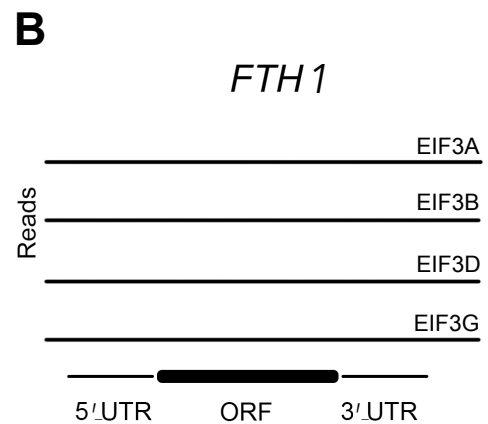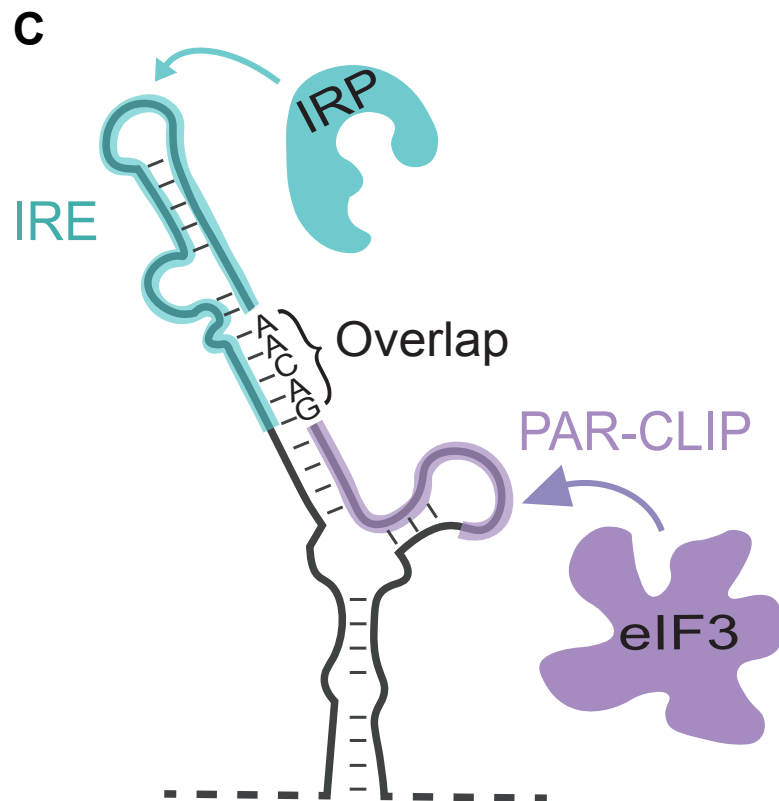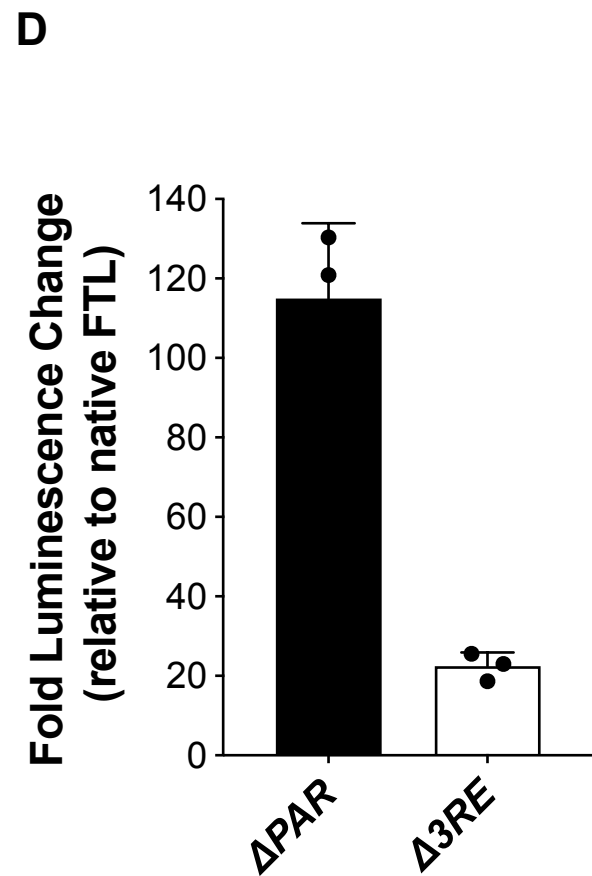

Supplement: supp [file elife-48193-supp-v1.zip › elife_poa_e48193_Figure_1_figure_supplement_1.pdf]

(1)  $FTL = y_1 x_1 + y_2 x_2 + x_3$

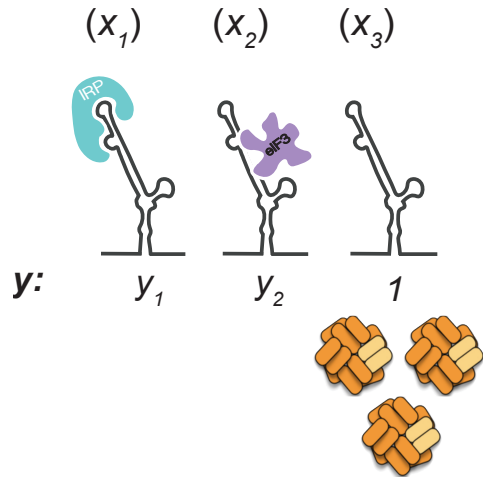

(2)  $\Delta 3RE = y_1(x_1 + \alpha) + x_2 - \alpha + x_3$

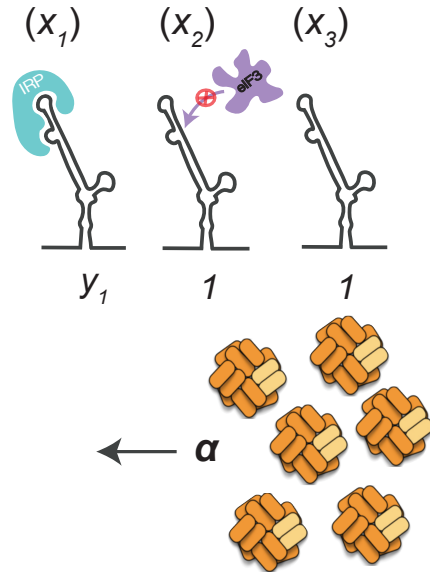

(3)  $Loop = x_1 - \beta + y_2(x_2 + \beta) + x_3$

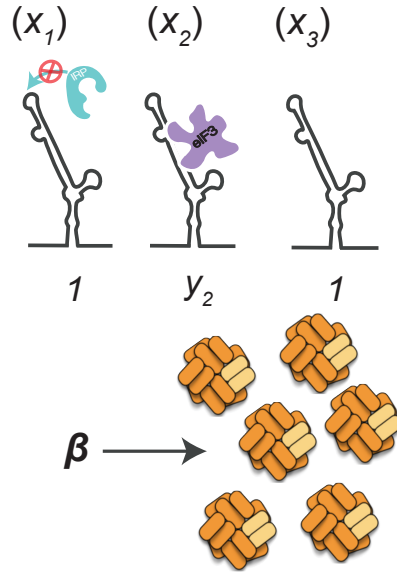

(4)  $Double = x_1 + x_2 + x_3$

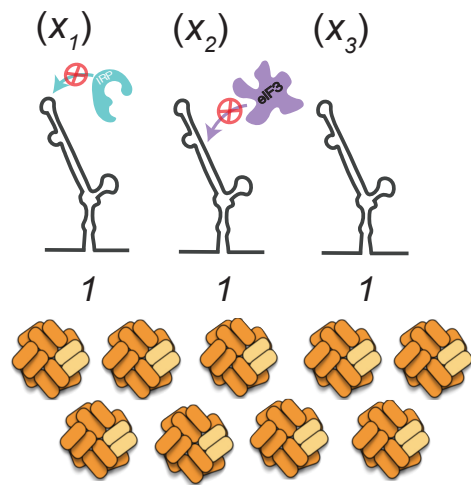

Supplement: supp [file elife-48193-supp-v1.zip › elife_poa_e48193_Figure_2_figure_supplement_3.pdf]

**A**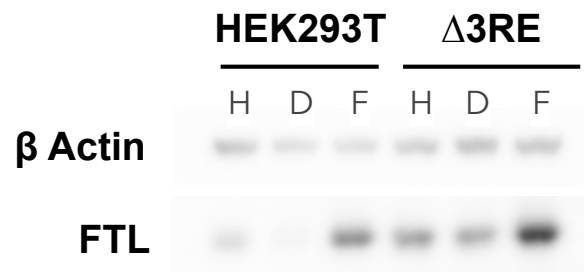**B**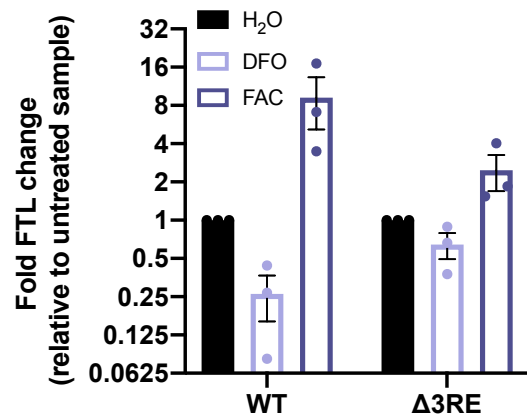**C**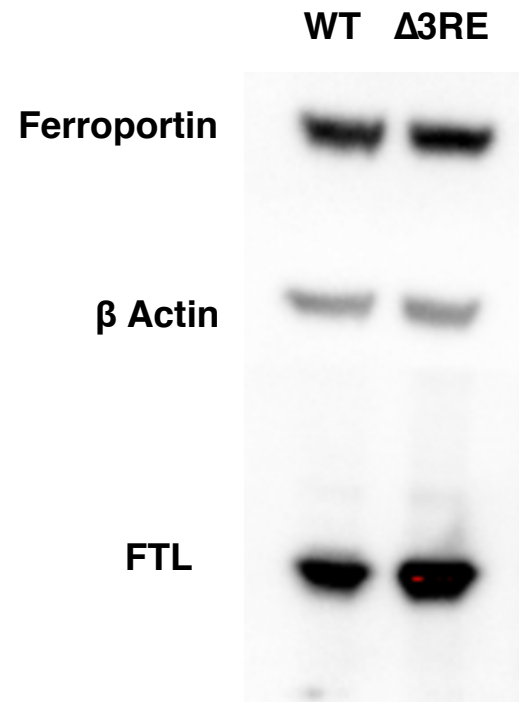

Supplement: supp [file elife-48193-supp-v1.zip › elife_poa_e48193_Figure_3_figure_supplement_5.pdf]

Competitor *FTL* RNA

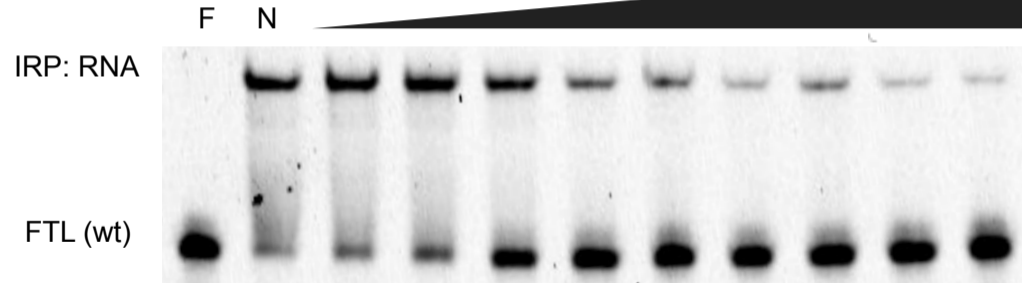

Competitor  $\Delta 3RE$  RNA

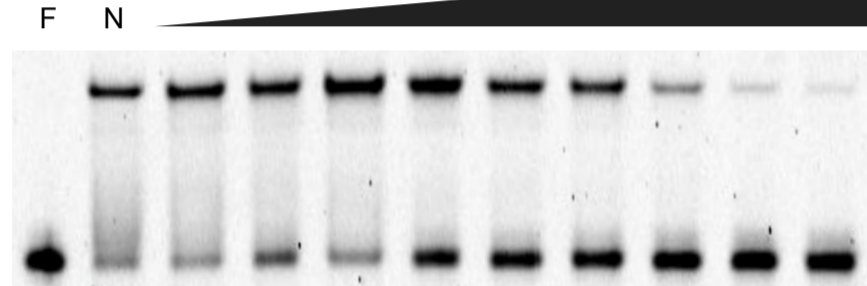

Supplement: supp [file elife-48193-supp-v1.zip › elife_poa_e48193_Figure_2_figure_supplement_1.pdf]

**A**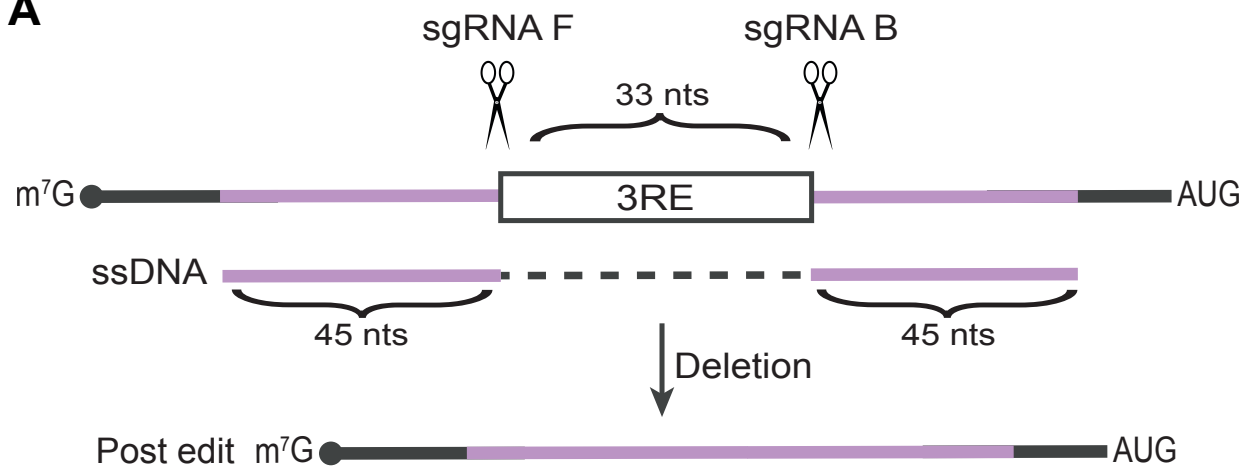**B**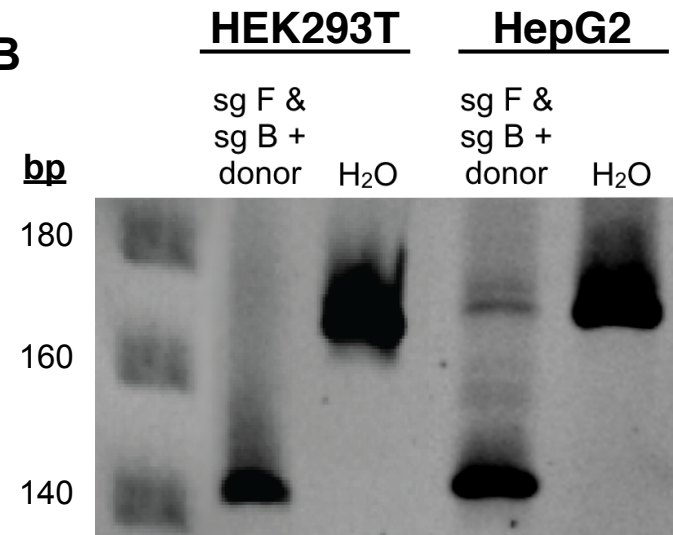**C**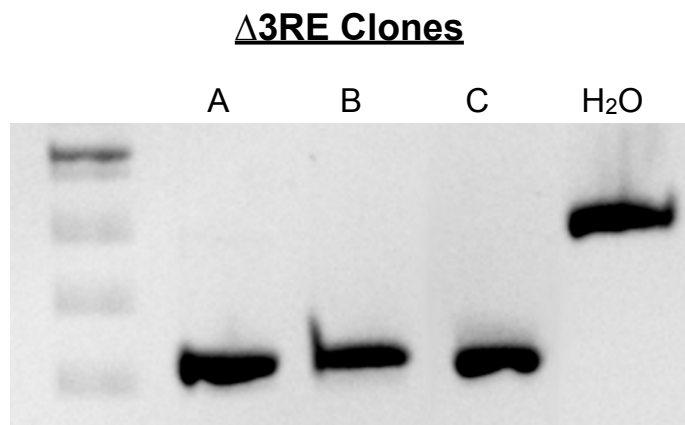**D**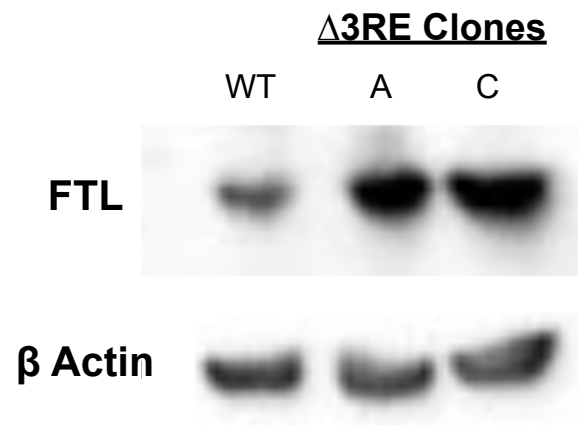

Supplement: supp [file elife-48193-supp-v1.zip › elife_poa_e48193_Figure_3_figure_supplement_1.pdf]

Competitor *FTL* RNA

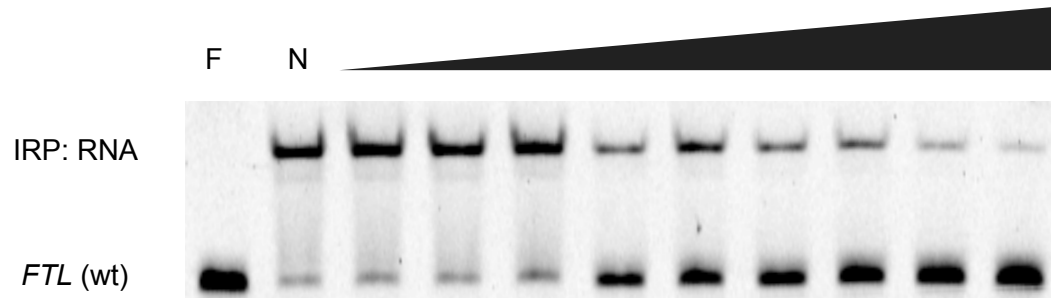

Competitor *G51C* RNA

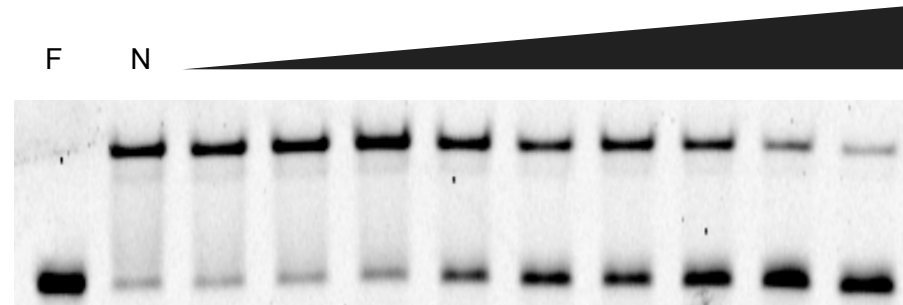

Competitor *G52C* RNA

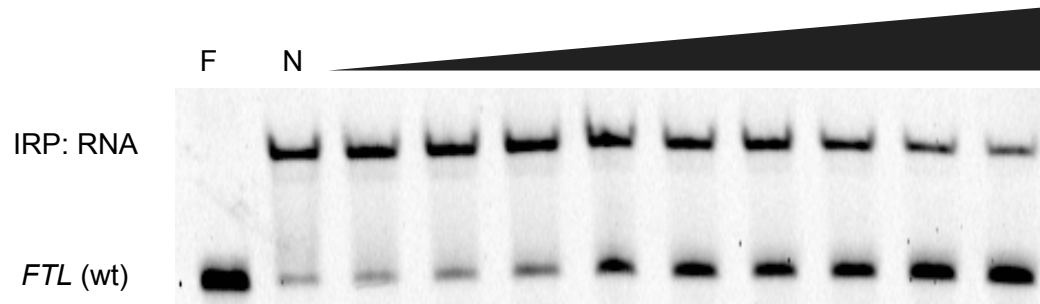

Competitor *Loop* RNA

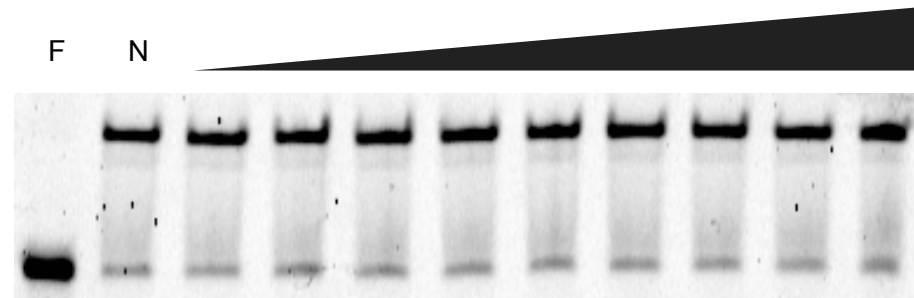

Supplement: supp [file elife-48193-supp-v1.zip › elife_poa_e48193_Figure_4_figure_supplement_1.pdf]

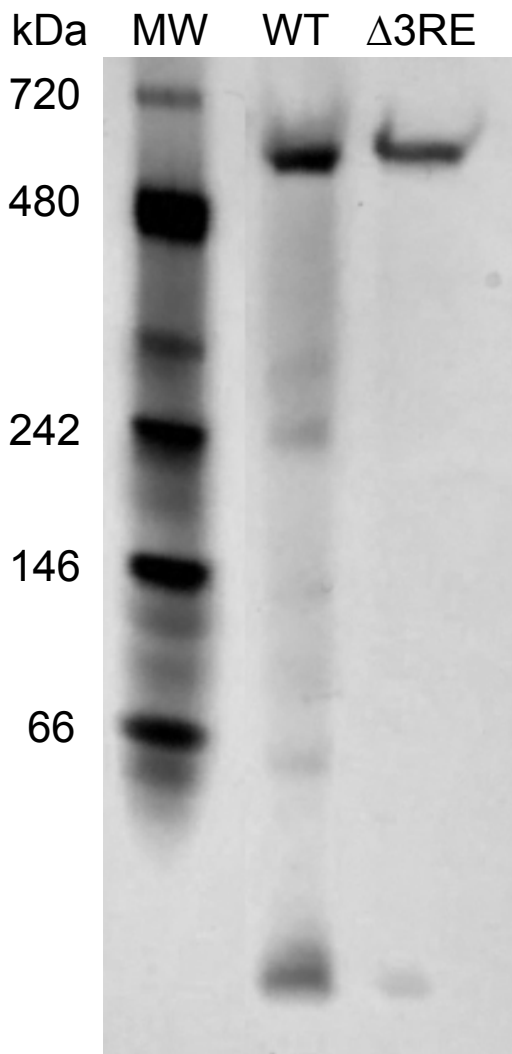

← **Full  
complex**

← **Monomers**

Supplement: supp [file elife-48193-supp-v1.zip › elife_poa_e48193_Figure_3_figure_supplement_6.pdf]

**A**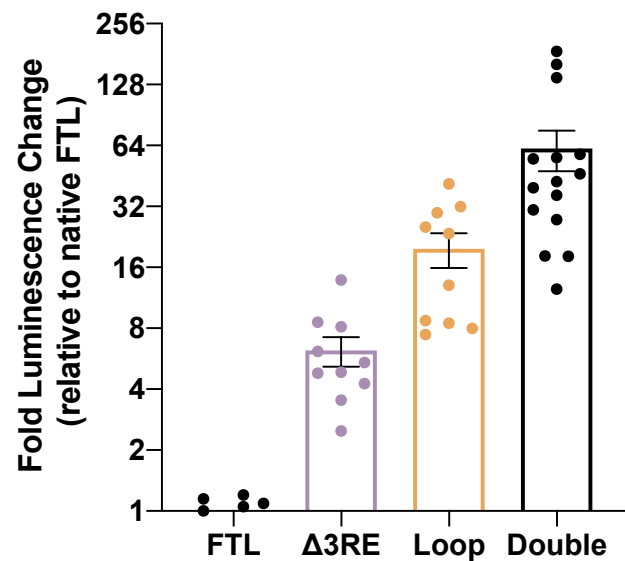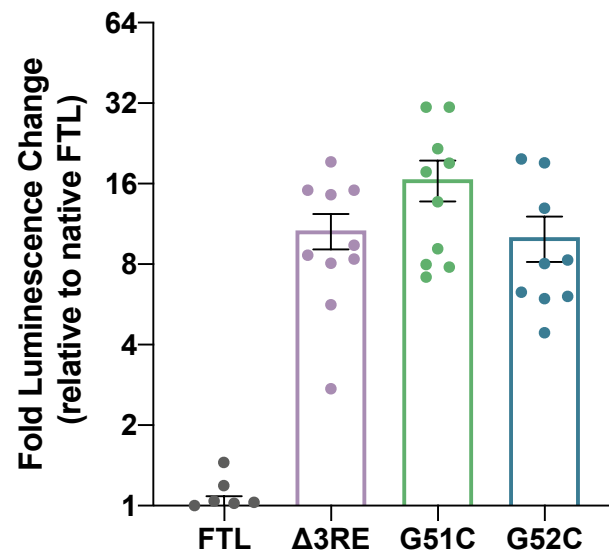**B**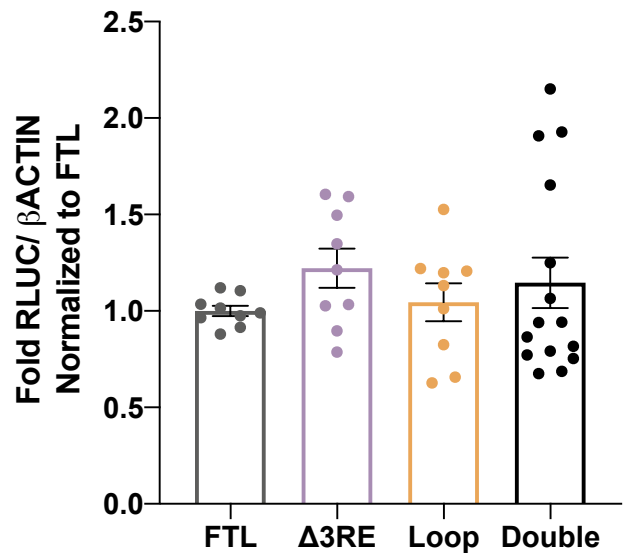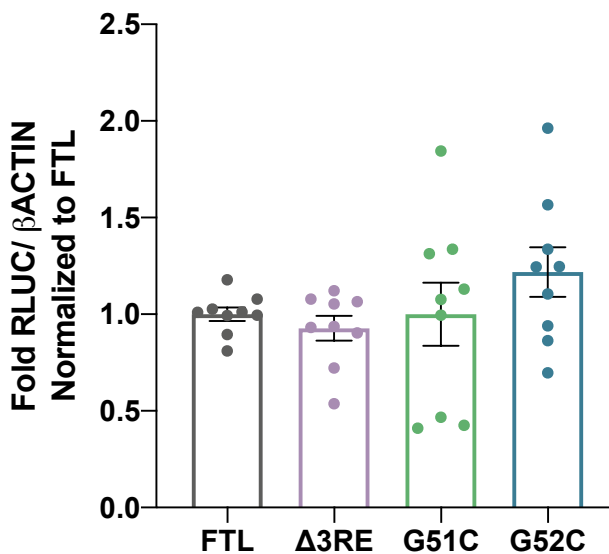

Supplement: supp [file elife-48193-supp-v1.zip › elife_poa_e48193_Figure_2_figure_supplement_2.pdf]

**A**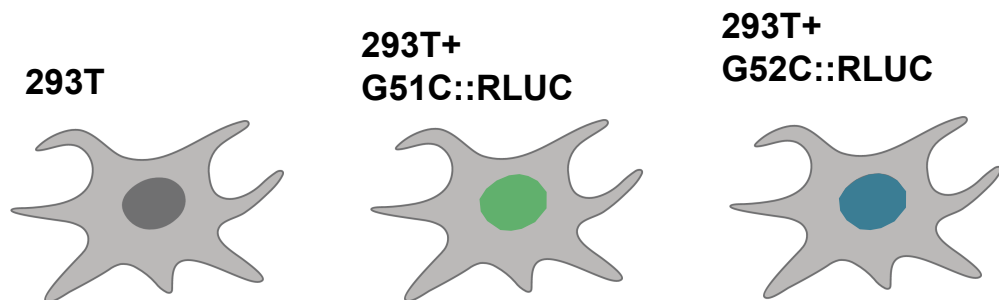**B**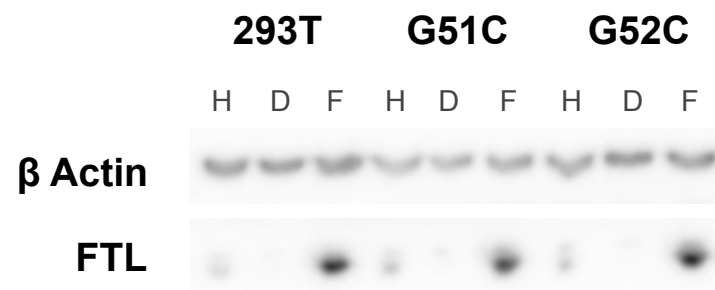**C**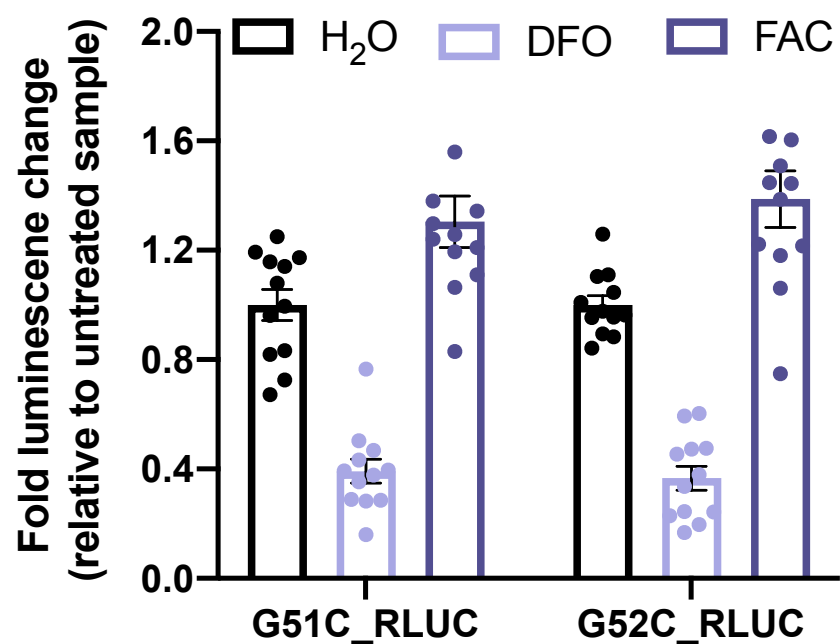**D**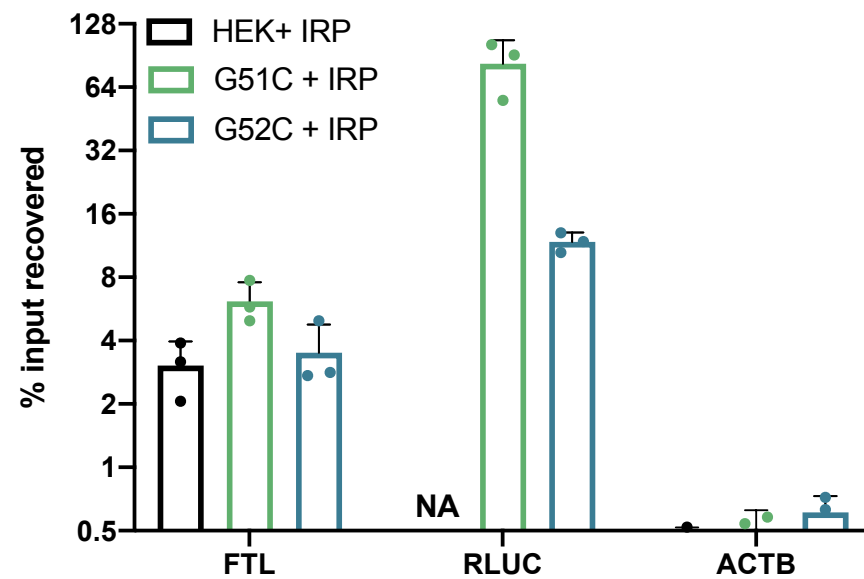

Supplement: supp [file elife-48193-supp-v1.zip › elife_poa_e48193_Figure_4_figure_supplement_2.pdf]

**A**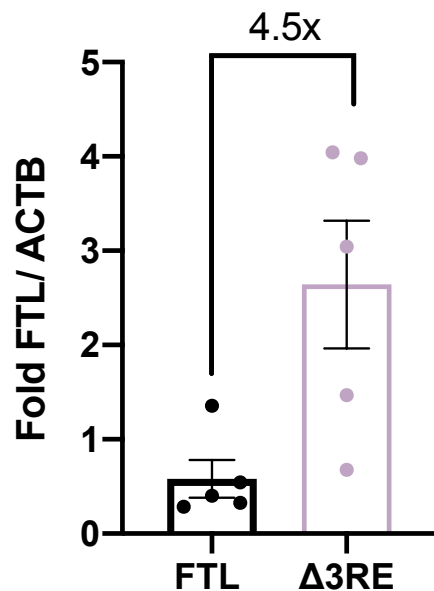**B**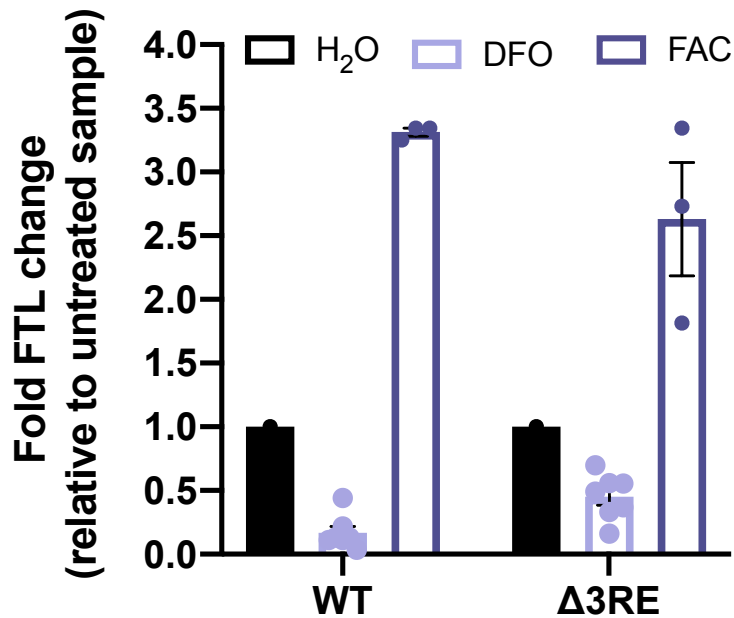**C**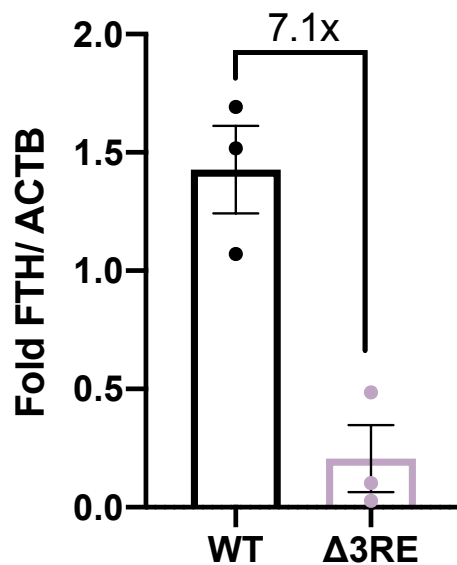**D**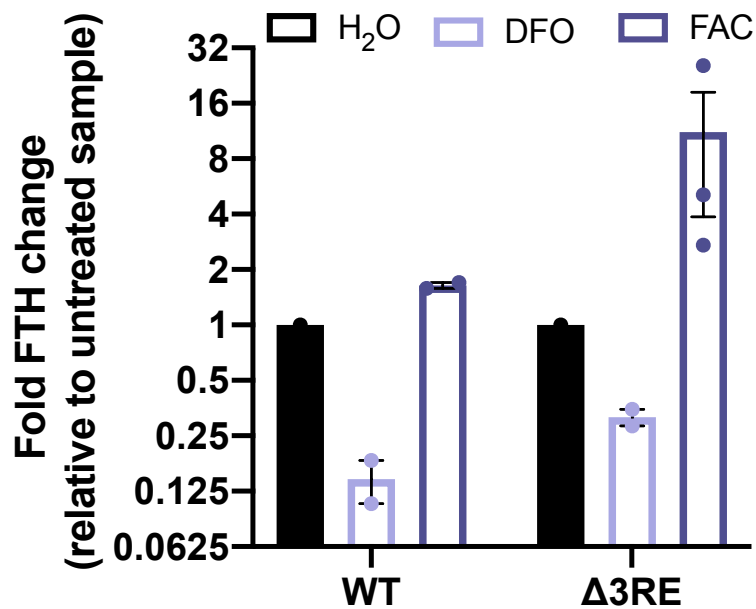

Supplement: supp [file elife-48193-supp-v1.zip › elife_poa_e48193_Figure_3_figure_supplement_4.pdf]

**A**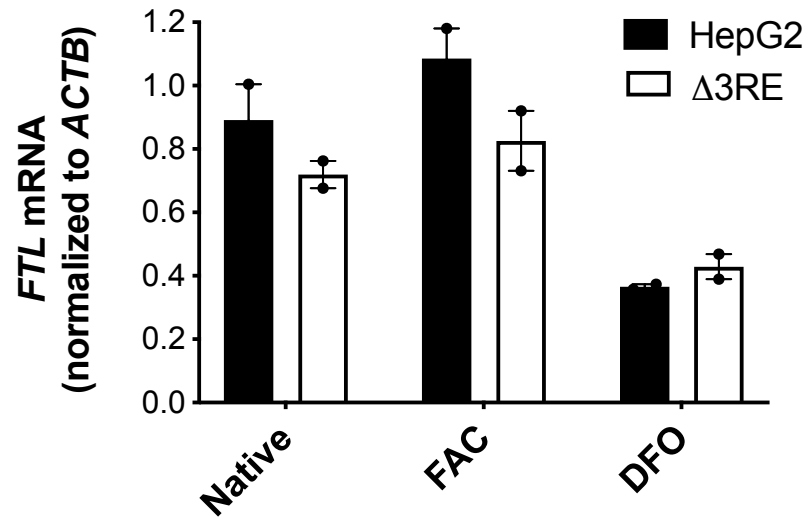**B**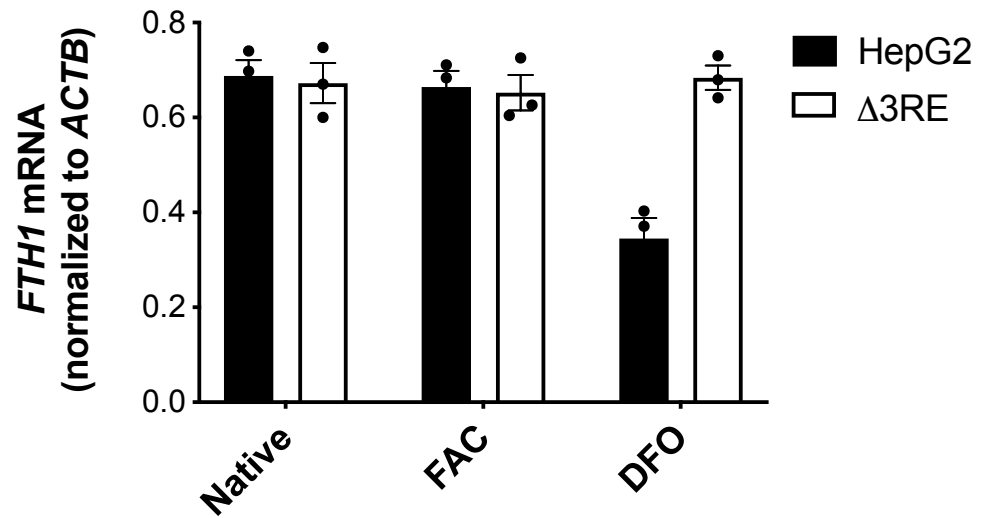

Supplement: supp [file elife-48193-supp-v1.zip › elife_poa_e48193_Figure_3_figure_supplement_2.pdf]
